# Supplementary material
Source: PubMed Central journal article supplement (PMC3784542)
Supplement: JCI69448sd.pdf [file JCI69448sd.pdf]

## Supplemental Material

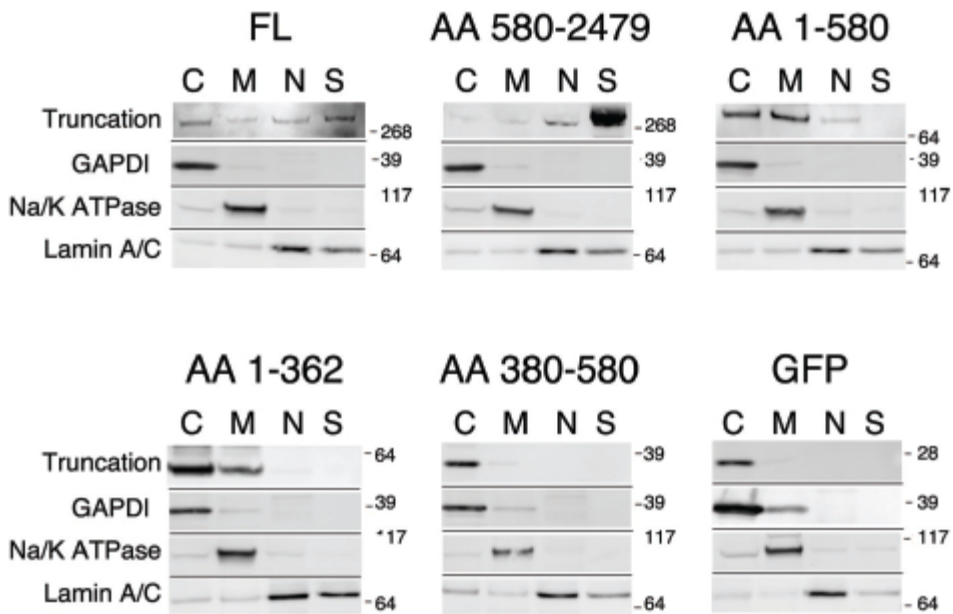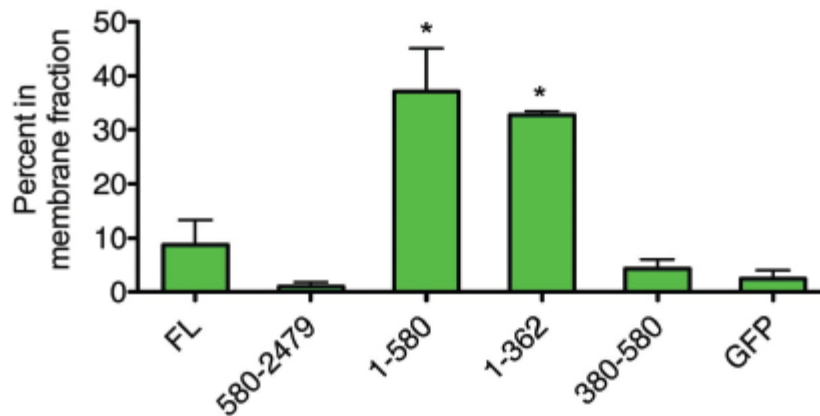

molecular weight markers are shown in kDa.

(B) Percent of each truncation present in the membrane fraction. Data are presented as mean  $\pm$  SD, n=3. Asterisks indicate statistical significance over GFP-alone.

## Supplemental Figure 1.

### Truncation of CEP290's

### C-terminus increases

### CEP290 membrane

### association

(A) Subcellular fractionation experiments performed on 293T cells expressing CEP290 constructs. Cells were fractionated into cytoplasmic (C), membrane (M), nuclear (N), and cytoskeletal (S) fractions and analyzed by western blotting. Relevant

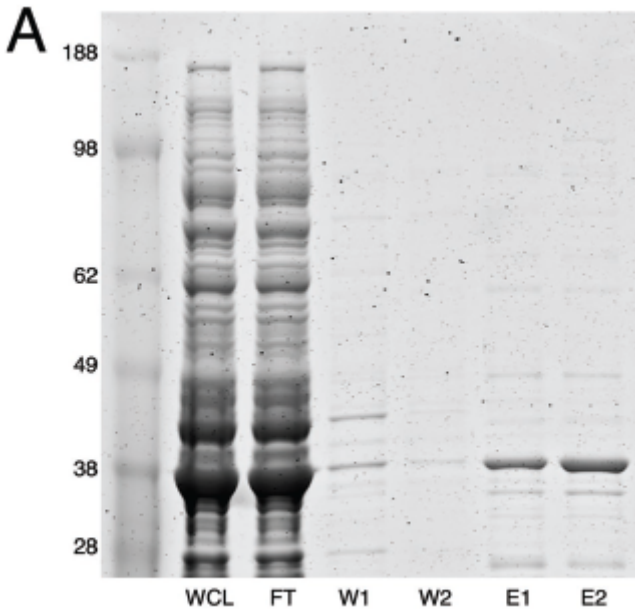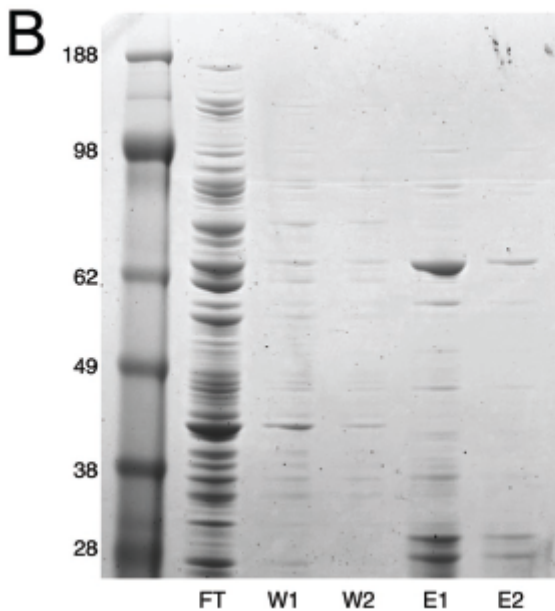

**Supplemental Figure 2. Expression and purification of CEP290**

**truncation mutants in bacterial cells**

CEP290 regions M (A) and aa 1-580

(B) were expressed from pDest-527 in

*E. coli* BL21(DE3)pLysS by IPTG

induction and purified by nickel affinity

chromatography. WCL is the whole

bacterial cell lysate. FT is the fraction

of lysate that did not bind to the Ni-

NTA resin. W1 and W2 are the

material that washed off the resin

during the first and second washes,

respectively. E1 is the first elution

fraction. E2 is the second elution

fraction. Relevant molecular weights

are indicated in kDa

**Supplemental Table 1. Primers used to generate truncation mutants**

| Truncation   | Primer  | Sequence                                                                   |
|--------------|---------|----------------------------------------------------------------------------|
| aa 1-2479    | Forward | GGGGACAAGTTTGTACAAAAAAGCAGGCTTCTGAAGGAGATAGAACCATGCCCCAAACATCAATTGG        |
|              | Reverse | GGGGACCACTTTGTACAAGAAAGCTGGGTCTAATAGATCGGGAAGTTAACAGG                      |
| aa 580-2479  | Forward | GGGGACAAGTTTGTACAAAAAAGCAGGCTTCTGAAGGAGATAGAACCATGACGGAGAACATAAGCCAAGG     |
|              | Reverse | GGGGACCACTTTGTACAAGAAAGCTGGGTCTAATAGATCGGGAAGTTAACAGG                      |
| aa 1-580     | Forward | GGGGACAAGTTTGTACAAAAAAGCAGGCTTCTGAAGGAGATAGAACCATGCCCCAAACATCAATTGG        |
|              | Reverse | GGGGACCACTTTGTACAAGAAAGCTGGGTCTAAGATTCTAGATCCTCGGTAG                       |
| aa 1-362     | Forward | GGGGACAAGTTTGTACAAAAAAGCAGGCTTCTGAAGGAGATAGAACCATGCCCCAAACATCAATTGG        |
|              | Reverse | GGGGACCACTTTGTACAAGAAAGCTGGGTCTAATCCCTTTCTTGGATTCCCTGC                     |
| aa 380-580   | Forward | GGGGACAAGTTTGTACAAAAAAGCAGGCTTCTGAAGGAGATAGAACCATGAAAAACACTTGCATCATTGAGGAC |
|              | Reverse | GGGGACCACTTTGTACAAGAAAGCTGGGTCTAAGATTCTAGATCCTCGGTAG                       |
| aa 1-1695    | Forward | GGGGACAAGTTTGTACAAAAAAGCAGGCTTCTGAAGGAGATAGAACCATGCCCCAAACATCAATTGG        |
|              | Reverse | GGGGACCACTTTGTACAAGAAAGCTGGGTCTAATCCAGCAGATACTTCAAATCC                     |
| aa 580-1695  | Forward | GGGGACAAGTTTGTACAAAAAAGCAGGCTTCTGAAGGAGATAGAACCATGACGGAGAACATAAGCCAAGG     |
|              | Reverse | GGGGACCACTTTGTACAAGAAAGCTGGGTCTAATCCAGCAGATACTTCAAATCC                     |
| aa 1-1966    | Forward | GGGGACAAGTTTGTACAAAAAAGCAGGCTTCTGAAGGAGATAGAACCATGCCCCAAACATCAATTGG        |
|              | Reverse | GGGGACCACTTTGTACAAGAAAGCTGGGTCTATGTTTTAGCTTTCTCTGCAG                       |
| aa 580-2479  | Forward | GGGGACAAGTTTGTACAAAAAAGCAGGCTTCTGAAGGAGATAGAACCATGACGGAGAACATAAGCCAAGG     |
|              | Reverse | GGGGACCACTTTGTACAAGAAAGCTGGGTCTAATAGATCGGGAAGTTAACAGG                      |
| aa 580-1966  | Forward | GGGGACAAGTTTGTACAAAAAAGCAGGCTTCTGAAGGAGATAGAACCATGACGGAGAACATAAGCCAAGG     |
|              | Reverse | GGGGACCACTTTGTACAAGAAAGCTGGGTCTATGTTTTAGCTTTCTCTGCAG                       |
| aa 1695-1966 | Forward | GGGGACAAGTTTGTACAAAAAAGCAGGCTTCTGAAGGAGATAGAACCATGCAGTCCAGAGGAGTCCAC       |
|              | Reverse | GGGGACCACTTTGTACAAGAAAGCTGGGTCTATGTTTTAGCTTTCTCTGCAG                       |
| aa 1966-2479 | Forward | GGGGACAAGTTTGTACAAAAAAGCAGGCTTCTGAAGGAGATAGAACCATGACAGGCATGACCGTGGAC       |
|              | Reverse | GGGGACCACTTTGTACAAGAAAGCTGGGTCTAATAGATCGGGAAGTTAACAGG                      |
| aa 1695-1903 | Forward | GGGGACAAGTTTGTACAAAAAAGCAGGCTTCTGAAGGAGATAGAACCATGCAGTCCAGAGGAGTCCAC       |
|              | Reverse | GGGGACCACTTTGTACAAGAAAGCTGGGTCTATTTCTTTTCATGGCTTAAGGTC                     |
| aa 1903-2479 | Forward | GGGGACAAGTTTGTACAAAAAAGCAGGCTTCTGAAGGAGATAGAACCATGACAGGCATGACCGTGGACC      |
|              | Reverse | GGGGACCACTTTGTACAAGAAAGCTGGGTCTAATAGATCGGGAAGTTAACAGG                      |
